# Supplementary material for: Preparation of Fe-BN-C catalysts derived from ZIF-8 and their performance in the oxygen reduction reaction
Source: Royal Society of Chemistry journal article supplement (doi:10.1039/d3ra07188j), 2024-01-01
Supplement: d3ra07188j1.pdf [file d3ra07188j1.pdf]

## Supplementary Information

### Preparation of Fe-BN-C catalyst on the base of ZIF-8 and its performance for oxygen reduction reaction

Jialu Ma, Wei Zhang, Feng Yang, Yingge Zhang, Xiaojun Xu, Guipeng Liu, Huiyu Xu, Gaochong Liu, Zhihui Wang, Supeng Pei\*

*School of Chemical and Environmental Engineering, Shanghai Institute of Technology, Shanghai 201418, China*

**Table S1** Surface areas and average pore diameters of the BN-C, Fe-BN-C-10, Fe-BN-C-20, Fe-BN-C-40 and Fe-BN-C-80.

|                                                 | BN-C  | Fe-BN-C-10 | Fe-BN-C-20 | Fe-BN-C-40 | Fe-BN-C-80 |
|-------------------------------------------------|-------|------------|------------|------------|------------|
| BET surface area ( $\text{m}^2 \text{g}^{-1}$ ) | 653.4 | 296.4      | 435.8      | 331.5      | 414.2      |
| Average pore diameter (nm)                      | 8.29  | 9.62       | 6.96       | 6.47       | 4.00       |

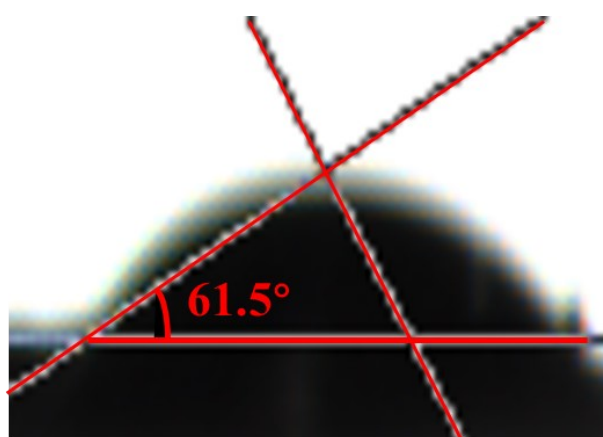

**Fig. S1** The contact angle of Fe-BN-C-20.

**Table S2** Iron content of the sample Fe-extraction obtained from ICP-MS analysis.

| Sample     | Fe wt.% |
|------------|---------|
| Fe-BN-C-10 | 0.53    |
| Fe-BN-C-20 | 2.53    |
| Fe-BN-C-40 | 2.44    |
| Fe-BN-C-80 | 2.34    |

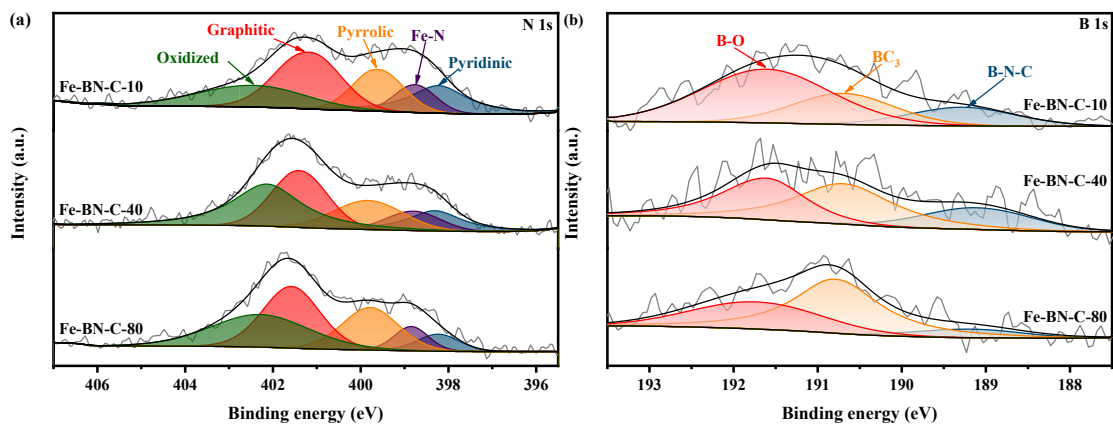

**Fig. S2** (a) N 1s XPS spectra of BN-C-10, Fe-BN-C-40 and Fe-BN-C-80. (b) B 1s XPS spectra of BN-C-10, Fe-BN-C-40 and Fe-BN-C-80.

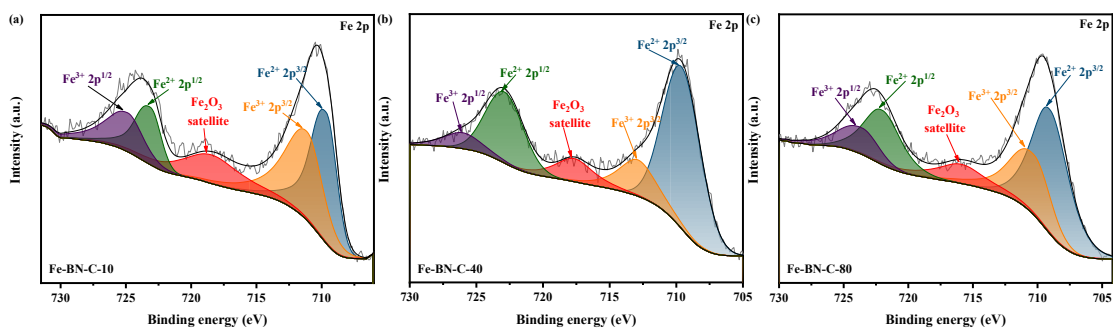

**Fig. S3** Fe 2p XPS spectra of (a) Fe-BN-C-10, (b) Fe-BN-C-40, (c) Fe-BN-C-80.

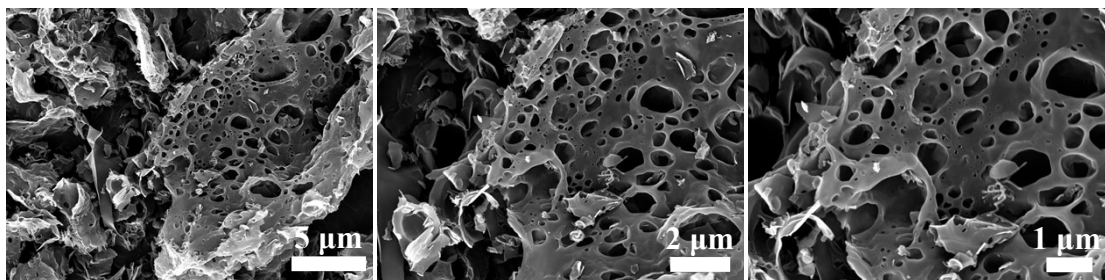

**Fig. S4** SEM image of Fe-BN-C-20 catalyst after 36000s stability test at 0.6 V vs. RHE.

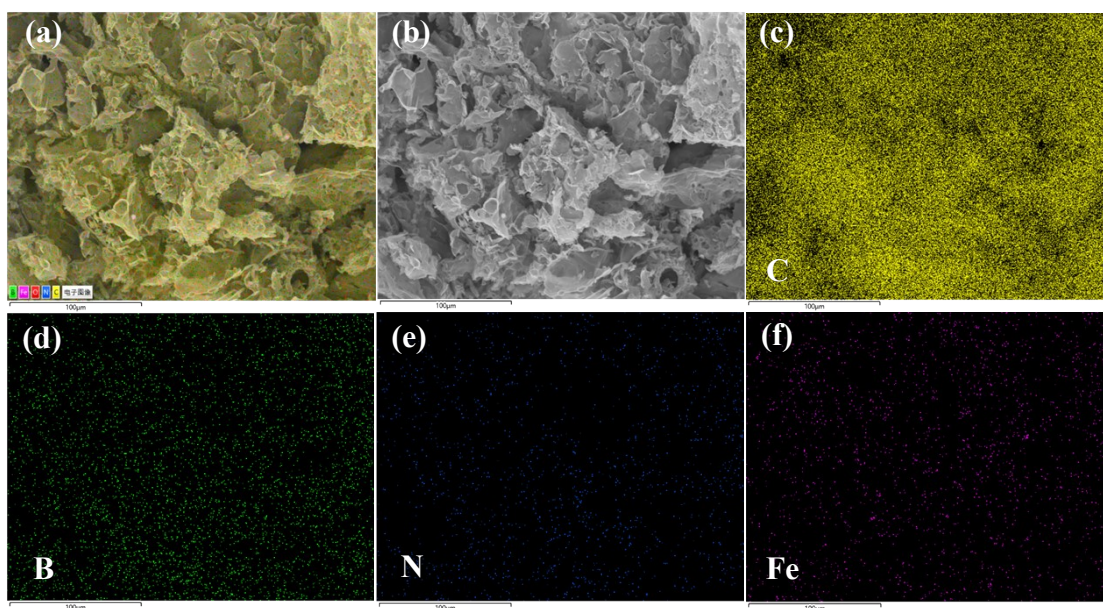

**Fig. S5** Element mapping of (c) carbon, (d) boron, (e) nitrogen and (f) iron in the Fe-BN-C-20 sample after stability test.

**Table S3** The quantitative elemental compositions of the Fe-BN-C-20 sample before and after stability test.

| Sample                   | Fe wt.% | B wt.% | C wt.% | N wt.% | O wt.% |
|--------------------------|---------|--------|--------|--------|--------|
| Before stability testing | 1.99    | 9.30   | 79.08  | 2.01   | 7.63   |
| After stability testing  | 1.72    | 6.01   | 81.8   | 1.70   | 8.76   |
